# Supplementary material
Source: PubMed Central journal article supplement (PMC5648351)
Supplement: NIHMS900869-supplement-supplement_1.pdf [file NIHMS900869-supplement-supplement_1.pdf]

## **SUPPLEMENT 1**

### **METHOD**

#### *Image Acquisition*

Whole-brain MRI scans were acquired using a standard quadrature GE 8-channel head coil and a GE Signa 3 Tesla LX scanner (Milwaukee, WI). Structural images were collected using a high-resolution T1-weighted FSPGR pulse sequence (inversion time 500 msec, echo time 2.5 msec, repetition time 6.3 msec, one excitation, matrix size 256 x 256, field of view x 25 cm, flip angle x11, number of slices 164, slice thickness 1 mm encoded for sagittal slice reconstruction, providing voxel dimensions of 1 mm isotropic).

#### *Image Processing*

Image processing, including cortical surface reconstruction and volumetric segmentation, was performed in FreeSurfer image analysis suite (version 5.3.0, <http://surfer.nmr.mgh.harvard.edu/>) using automated and semi-automated tools.<sup>1,2</sup> Briefly, T1-weighted images were registered to Talairach space, intensity variations corrected, and non-brain tissues (i.e., skull or extra-cerebral regions) removed. Data from each participant were segmented into grey and white matter, and a triangular tessellation cover was applied to each individual scan before the image was inflated for visualization of cortical surfaces within sulci. Each scan was then transformed into a parameterizable surface to ensure accurate alignment to a reference template, and the cerebral cortex was divided into parcels based on gyri and sulci positioning.<sup>3</sup> CT at every point on the smoothed, aligned images was then calculated by estimating the shortest distance between the pial surface and gray/white matter boundary at each point across the cortical mantle. To extract reliable CT estimates, the images were then automatically processed with the longitudinal stream.<sup>4</sup> Specifically an unbiased within-subject template space and image was created using robust, inverse consistent registration, and subsequent processing steps were then initialized with common information from the within-subject template.<sup>4</sup>

## SUPPLEMENTARY REFERENCES

1. Fischl B, Dale AM. Measuring the thickness of the human cerebral cortex from magnetic resonance images. *Proceedings of the National Academy of Sciences*. 2000;97:11050-11055.
2. Dale AM, Fischl B, Sereno MI. Cortical surface-based analysis. I. Segmentation and surface reconstruction. *Neuroimage*. 1999;9:179-194.
3. Desikan RS, Segonne F, Fischl B, et al. An automated labeling system for subdividing the human cerebral cortex on MRI scans into gyral based regions of interest. *Neuroimage*. 2006;31:968-980.
4. Reuter M, Schmansky NJ, Rosas HD, Fischl B. Within-subject template estimation for unbiased longitudinal image analysis. *Neuroimage*. 2012;61:1402-1418.

**Figure S1.** Data collection by age and assessment point. Note: BN = bulimia nervosa; HC = healthy control.

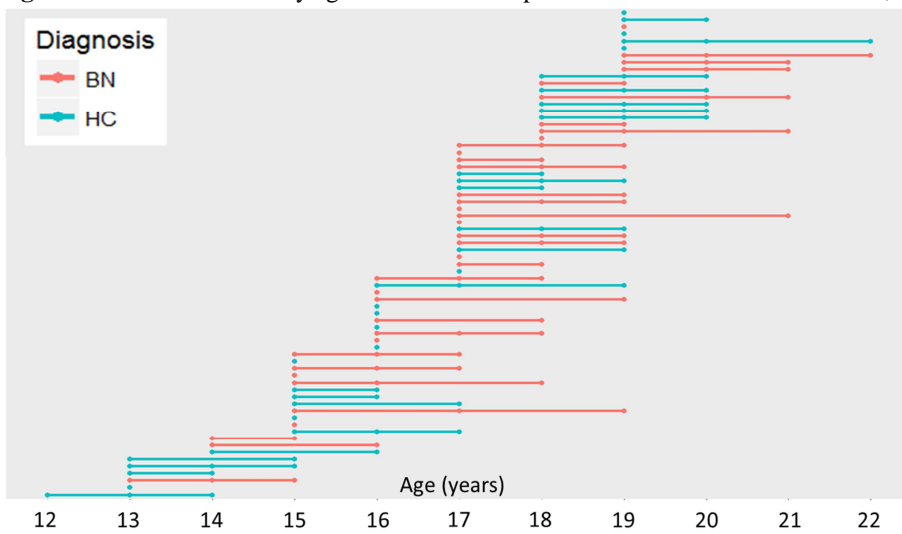

**Table S1.** Growth Curve Models Predicting Cortical Thickness in Healthy Controls (HC) Vs. Remitted Bulimia Nervosa (BN),<sup>a</sup> Adjusting for the Use of Selective Serotonin Reuptake Inhibitor (SSRIs) and Presence of Comorbid Depression or Anxiety

| Cortical Area                 | Side  | Characteristic <sup>b</sup> | <i>B</i> | <i>SE</i> | <i>t</i> | <i>p</i> |
|-------------------------------|-------|-----------------------------|----------|-----------|----------|----------|
| Inferior frontal gyrus (oper) | Right | Group                       | -0.11    | 0.05      | -2.32    | .02      |
|                               |       | Time                        | <0.01    | <0.01     | -2.28    | .03      |
|                               |       | Group*Time                  | <0.01    | <0.01     | 0.33     | .74      |
|                               |       | Age                         | -0.02    | 0.01      | -1.30    | .20      |
|                               |       | SSRI                        | -0.02    | 0.02      | -0.86    | .40      |
|                               |       | Comorbidities               | -0.01    | 0.02      | -0.39    | .70      |
| Inferior frontal gyrus (orb)  | Right | Group                       | 0.12     | 0.06      | 1.88     | .07      |
|                               |       | Time                        | <0.01    | <0.01     | 2.66     | .01      |
|                               |       | Group*Time                  | <0.01    | <0.01     | 0.40     | .69      |
|                               |       | Age                         | -0.03    | 0.02      | -2.08    | .04      |
|                               |       | SSRI                        | -0.02    | 0.03      | -0.59    | .56      |
|                               |       | Comorbidities               | -0.03    | 0.03      | -1.06    | .29      |

**Contrast comparisons of CT at 0, 12, 24, and 36 months, based on CT point slope estimates from growth curve models reported above**

| Cortical Area                 | Side  | 0 month              |           |          |          | 12 months            |           |          |          | 24 months            |           |          |          | 36 months            |           |          |          |
|-------------------------------|-------|----------------------|-----------|----------|----------|----------------------|-----------|----------|----------|----------------------|-----------|----------|----------|----------------------|-----------|----------|----------|
|                               |       | <i>B<sup>c</sup></i> | <i>SE</i> | <i>t</i> | <i>p</i> |
| Inferior frontal gyrus (oper) | Right | -0.11                | 0.05      | -2.32    | .02      | -0.11                | 0.05      | -2.31    | .02      | -0.10                | 0.05      | -2.18    | .03      | -0.10                | 0.05      | -1.96    | .05      |
| Inferior frontal gyrus (orb)  | Right | 0.12                 | 0.06      | 1.88     | .07      | 0.12                 | 0.06      | 2.08     | .04      | 0.13                 | 0.06      | 2.11     | .04      | 0.14                 | 0.07      | 2.01     | .05      |

Note: Oper = pars opercularis; orb = pars orbitalis.

<sup>a</sup> Remission is defined as >50% reduction in the frequency of objective bulimic episodes and vomiting episodes between baseline and last assessment.

<sup>b</sup> Group coded as HC=0, BN=1; Time coded as months from baseline; Age coded as years at baseline; SSRI coded as Not taking SSRI = 0, Taking SSRI = 1; Comorbidities coded as Absence = 0, Presence = 1.

<sup>c</sup> *B* estimates represent group difference in CT, where group was coded as HC = 0 and BN = 1.

**Table S2.** Multilevel Models of Cortical Thickness (CT) Predicting Bulimia Nervosa (BN) Symptoms<sup>a</sup>, Adjusting for the Use of Selective Serotonin Reuptake Inhibitors and Presence of Comorbid Depression or Anxiety

| BN symptom        | Cortical Area                | Side  | Between-subject <sup>b</sup> |           |          |          |
|-------------------|------------------------------|-------|------------------------------|-----------|----------|----------|
|                   |                              |       | <i>B</i>                     | <i>SE</i> | <i>t</i> | <i>p</i> |
| OBEs              | Frontal pole                 | Left  | -2.69                        | 1.06      | -2.5     | .02      |
| Vomiting episodes | Lateral orbitofrontal        | Right | -3.95                        | 1.96      | -2.01    | .06      |
|                   | Inferior frontal gyrus (orb) | Right | -3.41                        | 1.22      | -2.80    | .01      |

Note: OBE = objective binge-eating episodes; Orb = pars orbitalis.

<sup>a</sup> BN symptoms were the frequency of binge-eating and vomiting episodes over the past 28 days prior to scanning.

<sup>b</sup> Average CT over time is used as the between-subject predictor.

<sup>c</sup> Deviation at each time point from each participant's own average CT over time is used as the within-subject predictor.

**Table S3.** Baseline Demographic and Clinical Characteristics Across Bulimia Nervosa (BN) Subtypes

| Characteristic                             | BN<br>(n = 21) | OSFED-BN<br>(n = 12) | Analysis  |       |
|--------------------------------------------|----------------|----------------------|-----------|-------|
|                                            | Mean(SD)       | Mean(SD)             | t(df)     | p     |
| Age (years)                                | 17.0(1.3)      | 15.8(1.5)            | 2.52(31)  | .017  |
| Body mass index (kg/m <sup>2</sup> )       | 22.3(3.2)      | 21.7(1.4)            | -0.65(31) | .518  |
| Duration of illness (months)               | 29.9(20.6)     | 16.2(19.4)           | -1.91(31) | .070  |
| WAIS IQ score (Full)                       | 108.4(10.6)    | 105.9(12.5)          | 0.58(31)  | .567  |
| Eating Disorders Examination ratings       |                |                      |           |       |
| Objective bulimic episodes (past 28 days)  | 21.5(18.7)     | 0.9(1.7)             | -5.01(31) | <.001 |
| Subjective bulimic episodes (past 28 days) | 17.3(26.9)     | 20.2(20.1)           | -0.37(31) | .731  |
| Vomiting episodes (past 28 days)           | 34.6(26.2)     | 30.3(33.5)           | -0.38(31) | .712  |
| Loss of control (past 28 days)             | 38.7(31.7)     | 21.1(20.2)           | -1.95(31) | .063  |
| Prior AN (%)                               | 14.2           | 9.0                  |           |       |
| Comorbid MDD (%)                           | 42.9           | 41.7                 |           |       |
| Comorbid Anxiety (%)                       | 9.5            | 41.7                 |           |       |
| SSRIs use (%)                              | 23.8           | 33.3                 |           |       |
| Treatment                                  |                |                      |           |       |
| Inpatient (%)                              | 38.1           | 33.3                 |           |       |
| Outpatient (%)                             | 28.6           | 25.0                 |           |       |

**Note:** AN = anorexia nervosa; MDD = major depressive disorder; OSFED = other specified feeding or eating disorder; SSRI = selective serotonin reuptake inhibitor; WAIS = Weschler Adult Intelligence Scale.

**Table S4.** Time Intervals (in Months) Between Assessments Across Groups

| Time Interval | BN           | HC           | Analysis |     |
|---------------|--------------|--------------|----------|-----|
|               | Mean (SD)    | Mean (SD)    | t        | p   |
| FU1-Baseline  | 17.01 (7.47) | 13.97 (3.58) | -1.71    | .09 |
| FU2-FU1       | 15.03 (3.99) | 14.50 (2.11) | -0.42    | .68 |
| FU2-Baseline  | 29.41 (6.69) | 26.87 (2.16) | -1.26    | .22 |

Note: BN = bulimia nervosa; FU = follow-up; HC = healthy control.

**Table S5.** Test-Retest Pearson Correlations of Cortical Thickness (CT) Between Assessments Within Groups

| <b>BN Group</b>              |             | <b>Baseline &amp; FU1</b> |          | <b>FU1 &amp; FU2</b> |          | <b>Baseline &amp; FU2</b> |          |
|------------------------------|-------------|---------------------------|----------|----------------------|----------|---------------------------|----------|
| <b>Cortical Area</b>         | <b>Side</b> | <i>r</i>                  | <i>p</i> | <i>r</i>             | <i>p</i> | <i>r</i>                  | <i>p</i> |
| Inferior fronal gyrus (oper) | Left        | 0.80                      | <.01     | 0.82                 | <.01     | 0.74                      | <.01     |
|                              | Right       | 0.95                      | <.01     | 0.92                 | <.01     | 0.89                      | <.01     |
| Inferior fronal gyrus (orb)  | Left        | 0.84                      | <.01     | 0.63                 | .01      | 0.74                      | <.01     |
|                              | Right       | 0.89                      | <.01     | 0.91                 | <.01     | 0.90                      | <.01     |
| Inferior fronal gyrus (tri)  | Left        | 0.83                      | <.01     | 0.75                 | <.01     | 0.75                      | <.01     |
|                              | Right       | 0.75                      | <.01     | 0.80                 | <.01     | 0.74                      | <.01     |
| Lateral orbitofrontal        | Left        | 0.61                      | <.01     | 0.43                 | .10      | 0.38                      | .15      |
|                              | Right       | 0.53                      | .01      | 0.53                 | .03      | 0.51                      | .04      |
| Medial orbitofrontal         | Left        | 0.51                      | .01      | 0.37                 | .16      | 0.68                      | <.01     |
|                              | Right       | 0.52                      | .01      | 0.16                 | .56      | 0.28                      | .29      |
| Frontal pole                 | Left        | 0.86                      | <.01     | 0.72                 | <.01     | 0.88                      | <.01     |
|                              | Right       | 0.81                      | <.01     | 0.92                 | <.01     | 0.89                      | <.01     |

  

| <b>HC Group</b>              |             | <b>Baseline &amp; FU1</b> |          | <b>FU1 &amp; FU2</b> |          | <b>Baseline &amp; FU2</b> |          |
|------------------------------|-------------|---------------------------|----------|----------------------|----------|---------------------------|----------|
| <b>Cortical Area</b>         | <b>Side</b> | <i>r</i>                  | <i>p</i> | <i>r</i>             | <i>p</i> | <i>r</i>                  | <i>p</i> |
| Inferior fronal gyrus (oper) | Left        | 0.92                      | <.01     | 0.92                 | <.01     | 0.85                      | <.01     |
|                              | Right       | 0.94                      | <.01     | 0.91                 | <.01     | 0.93                      | <.01     |
| Inferior fronal gyrus (orb)  | Left        | 0.84                      | <.01     | 0.86                 | <.01     | 0.80                      | <.01     |
|                              | Right       | 0.90                      | <.01     | 0.86                 | <.01     | 0.87                      | <.01     |
| Inferior fronal gyrus (tri)  | Left        | 0.86                      | <.01     | 0.91                 | <.01     | 0.87                      | <.01     |
|                              | Right       | 0.85                      | <.01     | 0.94                 | <.01     | 0.93                      | <.01     |
| Lateral orbitofrontal        | Left        | 0.75                      | <.01     | 0.91                 | <.01     | 0.91                      | <.01     |
|                              | Right       | 0.70                      | <.01     | 0.72                 | .01      | 0.77                      | .01      |
| Medial orbitofrontal         | Left        | 0.69                      | <.01     | 0.84                 | <.01     | 0.84                      | <.01     |
|                              | Right       | 0.63                      | <.01     | 0.75                 | .01      | 0.80                      | <.01     |
| Frontal pole                 | Left        | 0.90                      | <.01     | 0.92                 | <.01     | 0.89                      | <.01     |
|                              | Right       | 0.91                      | <.01     | 0.86                 | <.01     | 0.72                      | .01      |

Note: BN = bulimia nervosa; FU1 = first follow-up; FU2 = second follow-up; oper = pars opercularis; orb = pars orbitalis; tri = pars triangularis.

**Table S6.** Test-Retest Pearson Correlations of Bulimia Nervosa (BN) Symptoms Between Assessments Within the BN Group

| <b>Cortical Area</b>    | <b>Baseline &amp; FU1</b> |          | <b>FU1 &amp; FU2</b> |          | <b>Baseline &amp; FU2</b> |          |
|-------------------------|---------------------------|----------|----------------------|----------|---------------------------|----------|
|                         | <i>r</i>                  | <i>p</i> | <i>r</i>             | <i>p</i> | <i>r</i>                  | <i>p</i> |
| OBE (past 28 days)      | 0.62165                   | .0012    | 0.78564              | .0005    | 0.23502                   | .3991    |
| Vomiting (past 28 days) | 0.46165                   | .0232    | 0.62608              | .0125    | -0.04421                  | .8757    |

Note: FU = follow-up; OBE = objective bulimic episodes.

**Table S7.** Growth Curve Models Predicting Cortical Thickness in Healthy Controls (HC) Vs. Bulimia Nervosa (BN)

| Cortical Area                 | Characteristic <sup>a</sup> | Left Hemisphere |           |          |          | Right Hemisphere |           |          |          |
|-------------------------------|-----------------------------|-----------------|-----------|----------|----------|------------------|-----------|----------|----------|
|                               |                             | <i>B</i>        | <i>SE</i> | <i>t</i> | <i>p</i> | <i>B</i>         | <i>SE</i> | <i>t</i> | <i>p</i> |
| Inferior frontal gyrus (oper) | Group                       | -0.08           | 0.03      | -2.50    | 0.01     | -0.07            | 0.04      | -1.94    | 0.06     |
|                               | Time                        | <0.01           | <0.01     | 0.71     | 0.48     | <0.01            | <0.01     | -2.35    | 0.02     |
|                               | Group*Time                  | <0.01           | <0.01     | 0.83     | 0.41     | <0.01            | <0.01     | 0.77     | 0.44     |
|                               | Age                         | -0.02           | 0.01      | -1.95    | 0.06     | -0.01            | 0.01      | -0.97    | 0.34     |
| Inferior frontal gyrus (orb)  | Group                       | -0.05           | 0.05      | -0.93    | 0.36     | 0.09             | 0.06      | 1.60     | 0.11     |
|                               | Time                        | <0.01           | <0.01     | 2.23     | 0.03     | <0.01            | <0.01     | 2.60     | 0.01     |
|                               | Group*Time                  | <0.01           | <0.01     | 0.07     | 0.94     | <0.01            | <0.01     | 0.41     | 0.68     |
|                               | Age                         | -0.01           | 0.01      | -0.59    | 0.56     | -0.03            | 0.02      | -1.89    | 0.06     |
| Inferior frontal gyrus (tri)  | Group                       | -0.06           | 0.04      | -1.60    | 0.12     | -0.07            | 0.03      | -1.90    | 0.06     |
|                               | Time                        | <0.01           | <0.01     | 0.52     | 0.61     | <0.01            | <0.01     | -1.89    | 0.06     |
|                               | Group*Time                  | <0.01           | <0.01     | 0.78     | 0.44     | <0.01            | <0.01     | 1.54     | 0.13     |
|                               | Age                         | -0.01           | 0.01      | -0.80    | 0.43     | -0.02            | 0.01      | -2.57    | 0.01     |
| Lateral orbitofrontal         | Group                       | <0.01           | 0.04      | 0.10     | 0.92     | -0.04            | 0.04      | -0.83    | 0.41     |
|                               | Time                        | 0.01            | <0.01     | 6.31     | <0.01    | 0.01             | <0.01     | 5.60     | <0.01    |
|                               | Group*Time                  | <0.01           | <0.01     | -1.76    | 0.08     | <0.01            | <0.01     | -0.68    | 0.50     |
|                               | Age                         | -0.02           | 0.01      | -1.93    | 0.06     | -0.01            | 0.01      | -0.97    | 0.34     |
| Medial orbitofrontal          | Group                       | -0.03           | 0.04      | -0.62    | 0.54     | -0.05            | 0.04      | -1.29    | 0.20     |
|                               | Time                        | 0.01            | <0.01     | 5.19     | <0.01    | <0.01            | <0.01     | 2.32     | 0.02     |
|                               | Group*Time                  | <0.01           | <0.01     | -1.33    | 0.19     | <0.01            | <0.01     | 0.32     | 0.75     |
|                               | Age                         | -0.02           | 0.01      | -1.85    | 0.07     | <0.01            | 0.01      | 0.42     | 0.68     |
| Frontal pole                  | Group                       | -0.15           | 0.06      | -2.38    | 0.02     | -0.10            | 0.05      | -2.02    | 0.05     |
|                               | Time                        | <0.01           | <0.01     | 0.44     | 0.66     | <0.01            | <0.01     | 1.03     | 0.31     |
|                               | Group*Time                  | <0.01           | <0.01     | 0.33     | 0.74     | <0.01            | <0.01     | 0.92     | 0.36     |
|                               | Age                         | -0.02           | 0.02      | -0.98    | 0.33     | -0.02            | 0.01      | -1.17    | 0.25     |

Note: oper = pars opercularis; orb = pars orbitalis; tri = pars triangularis.

<sup>a</sup> Group coded as HC=0, BN=1; Time coded as months from baseline; Age coded as years at baseline.

**Table S8.** Growth curve models predicting Cortical Thickness in Healthy Controls (HC) Vs. Remitted Bulimia Nervosa (BN)<sup>a</sup>

| Cortical Area                 | Characteristic <sup>b</sup> | Left Hemisphere |           |          |          | Right Hemisphere |           |          |          |
|-------------------------------|-----------------------------|-----------------|-----------|----------|----------|------------------|-----------|----------|----------|
|                               |                             | <i>B</i>        | <i>SE</i> | <i>t</i> | <i>p</i> | <i>B</i>         | <i>SE</i> | <i>t</i> | <i>p</i> |
| Inferior frontal gyrus (oper) | Group                       | -0.07           | 0.04      | -1.77    | 0.08     | -0.10            | 0.05      | -2.22    | 0.03     |
|                               | Time                        | <0.01           | <0.01     | 0.72     | 0.47     | <0.01            | <0.01     | -2.28    | 0.03     |
|                               | Group*Time                  | <0.01           | <0.01     | 0.03     | 0.97     | <0.01            | <0.01     | 0.32     | 0.75     |
|                               | Age                         | -0.02           | 0.01      | -2.07    | 0.04     | -0.02            | 0.01      | -1.30    | 0.20     |
| Inferior frontal gyrus (orb)  | Group                       | -0.03           | 0.06      | -0.50    | 0.62     | 0.14             | 0.06      | 2.36     | 0.02     |
|                               | Time                        | <0.01           | <0.01     | 2.23     | 0.03     | <0.01            | <0.01     | 2.66     | 0.01     |
|                               | Group*Time                  | <0.01           | <0.01     | -0.23    | 0.82     | <0.01            | <0.01     | 0.13     | 0.90     |
|                               | Age                         | -0.02           | 0.01      | -1.17    | 0.24     | -0.03            | 0.02      | -2.09    | 0.04     |
| Inferior frontal gyrus (tri)  | Group                       | -0.06           | 0.05      | -1.37    | 0.18     | -0.06            | 0.04      | -1.56    | 0.12     |
|                               | Time                        | <0.01           | <0.01     | 0.51     | 0.61     | <0.01            | <0.01     | -2.01    | 0.05     |
|                               | Group*Time                  | <0.01           | <0.01     | 0.03     | 0.98     | <0.01            | <0.01     | 1.59     | 0.12     |
|                               | Age                         | -0.01           | 0.01      | -1.11    | 0.27     | -0.03            | 0.01      | -2.59    | 0.01     |
| Lateral orbitofrontal         | Group                       | -0.01           | 0.04      | -0.13    | 0.90     | -0.03            | 0.05      | -0.52    | 0.61     |
|                               | Time                        | 0.01            | <0.01     | 7.03     | <0.01    | 0.01             | <0.01     | 5.45     | <0.01    |
|                               | Group*Time                  | <0.01           | <0.01     | -1.93    | 0.06     | <0.01            | <0.01     | -0.91    | 0.36     |
|                               | Age                         | -0.02           | 0.01      | -2.26    | 0.03     | -0.02            | 0.01      | -1.45    | 0.15     |
| Medial orbitofrontal          | Group                       | -0.06           | 0.05      | -1.17    | 0.25     | -0.05            | 0.04      | -1.18    | 0.24     |
|                               | Time                        | 0.01            | <0.01     | 5.83     | <0.01    | <0.01            | <0.01     | 2.41     | 0.02     |
|                               | Group*Time                  | <0.01           | <0.01     | -1.73    | 0.09     | <0.01            | <0.01     | -0.27    | 0.79     |
|                               | Age                         | -0.02           | 0.01      | -1.65    | 0.10     | <0.01            | 0.01      | -0.36    | 0.72     |
| Frontal pole                  | Group                       | -0.12           | 0.07      | -1.76    | 0.08     | -0.11            | 0.06      | -1.80    | 0.08     |
|                               | Time                        | 0.00            | 0.00      | 0.48     | 0.64     | 0.00             | 0.00      | 1.02     | 0.31     |
|                               | Group*Time                  | 0.00            | 0.00      | -0.23    | 0.82     | 0.00             | 0.00      | 0.46     | 0.65     |
|                               | Age                         | -0.02           | 0.02      | -1.40    | 0.17     | -0.02            | 0.02      | -1.41    | 0.16     |

Note: Oper = pars opercularis; orb = pars orbitalis.

<sup>a</sup> Remission is defined as >50% reduction in the frequency of objective bulimic episodes and vomiting episodes between baseline and last assessment.

<sup>b</sup> Group coded as HC=0, BN=1; Time coded as months from baseline; Age coded as years at baseline.

**Table S9.** Multilevel Models of Cortical Thickness (CT) Predicting the Frequency of Episodes Over the Past 28 Days Prior to Scanning

| <b>OBEs</b>                   |             | <b>Between-subject<sup>a</sup></b> |           |          |          | <b>Within-subject<sup>b</sup></b> |           |          |          |
|-------------------------------|-------------|------------------------------------|-----------|----------|----------|-----------------------------------|-----------|----------|----------|
| <b>Cortical Area</b>          | <b>Side</b> | <b>B</b>                           | <b>SE</b> | <b>t</b> | <b>p</b> | <b>B</b>                          | <b>SE</b> | <b>t</b> | <b>p</b> |
| Inferior frontal gyrus (oper) | Left        | -2.42                              | 2.16      | -1.12    | 0.27     | 4.00                              | 3.03      | 1.32     | 0.19     |
|                               | Right       | -1.28                              | 1.79      | -0.72    | 0.48     | -0.52                             | 4.02      | -0.13    | 0.90     |
| Inferior frontal gyrus (orb)  | Left        | -1.14                              | 1.47      | -0.77    | 0.45     | -0.25                             | 1.90      | -0.13    | 0.90     |
|                               | Right       | -1.87                              | 1.30      | -1.44    | 0.16     | 2.46                              | 2.31      | 1.07     | 0.29     |
| Inferior frontal gyrus (tri)  | Left        | -0.87                              | 1.74      | -0.50    | 0.62     | 2.31                              | 2.39      | 0.97     | 0.34     |
|                               | Right       | -1.38                              | 2.12      | -0.65    | 0.52     | 0.68                              | 2.76      | 0.25     | 0.81     |
| Lateral orbitofrontal         | Left        | 3.60                               | 2.36      | 1.53     | 0.14     | -0.39                             | 1.93      | -0.20    | 0.84     |
|                               | Right       | -1.61                              | 2.07      | -0.78    | 0.45     | 1.12                              | 1.59      | 0.70     | 0.49     |
| Medial orbitofrontal          | Left        | 0.26                               | 1.91      | 0.14     | 0.89     | 0.35                              | 1.41      | 0.25     | 0.81     |
|                               | Right       | 0.39                               | 2.62      | 0.15     | 0.88     | -0.02                             | 1.78      | -0.01    | 0.99     |
| Frontal pole                  | Left        | -2.63                              | 1.05      | -2.50    | 0.02     | 2.45                              | 1.93      | 1.27     | 0.21     |
|                               | Right       | -1.44                              | 1.28      | -1.12    | 0.27     | -0.02                             | 2.20      | -0.01    | 0.99     |

| <b>Vomiting Episodes</b>      |             | <b>Between-subject<sup>a</sup></b> |           |          |          | <b>Within-subject<sup>b</sup></b> |           |          |          |
|-------------------------------|-------------|------------------------------------|-----------|----------|----------|-----------------------------------|-----------|----------|----------|
| <b>Cortical Area</b>          | <b>Side</b> | <b>B</b>                           | <b>SE</b> | <b>t</b> | <b>p</b> | <b>B</b>                          | <b>SE</b> | <b>t</b> | <b>p</b> |
| Inferior frontal gyrus (oper) | Left        | -0.35                              | 2.24      | -0.15    | 0.88     | 3.80                              | 3.45      | 1.10     | 0.28     |
|                               | Right       | -0.92                              | 1.82      | -0.50    | 0.62     | 3.17                              | 4.90      | 0.65     | 0.52     |
| Inferior frontal gyrus (orb)  | Left        | -2.81                              | 1.41      | -1.99    | 0.06     | 3.46                              | 2.26      | 1.53     | 0.13     |
|                               | Right       | -3.40                              | 1.20      | -2.84    | 0.01     | 3.45                              | 2.60      | 1.32     | 0.19     |
| Inferior frontal gyrus (tri)  | Left        | 0.39                               | 1.78      | 0.22     | 0.83     | 5.56                              | 2.74      | 2.02     | 0.05     |
|                               | Right       | 1.20                               | 2.14      | 0.56     | 0.58     | 2.98                              | 3.03      | 0.99     | 0.33     |
| Lateral orbitofrontal         | Left        | -1.33                              | 2.54      | -0.53    | 0.60     | 1.90                              | 2.23      | 0.85     | 0.40     |
|                               | Right       | -3.99                              | 1.92      | -2.08    | 0.05     | 0.26                              | 1.91      | 0.14     | 0.89     |
| Medial orbitofrontal          | Left        | -2.18                              | 1.87      | -1.17    | 0.25     | 0.82                              | 1.63      | 0.50     | 0.62     |
|                               | Right       | -2.79                              | 2.64      | -1.06    | 0.30     | -1.99                             | 2.13      | -0.93    | 0.36     |
| Frontal pole                  | Left        | -1.90                              | 1.11      | -1.70    | 0.10     | 3.36                              | 2.25      | 1.50     | 0.14     |
|                               | Right       | -0.98                              | 1.29      | -0.76    | 0.46     | -0.39                             | 2.46      | -0.16    | 0.88     |

Note: OBEs = objective bulimic episodes; Oper = pars opercularis; orb = pars orbitalis.

<sup>a</sup> Average CT over time is used as the between-subject predictor.

<sup>b</sup> Deviation at each time point from each participant's own average CT over time is used as the within-subject predictor.
